# Supplementary material for: Identification of quantitative trait loci controlling grain size and shape in the D genome of synthetic hexaploid wheat lines
Source: PubMed Central journal article supplement — Breed Sci. 2013 Dec 1;63(4):423–9. doi: 10.1270/jsbbs.63.423 (PMC3859354; doi:10.1270/jsbbs.63.423), 2013-12-01
Supplement: 63_423_s1.pdf [file 63_423_s1.pdf]

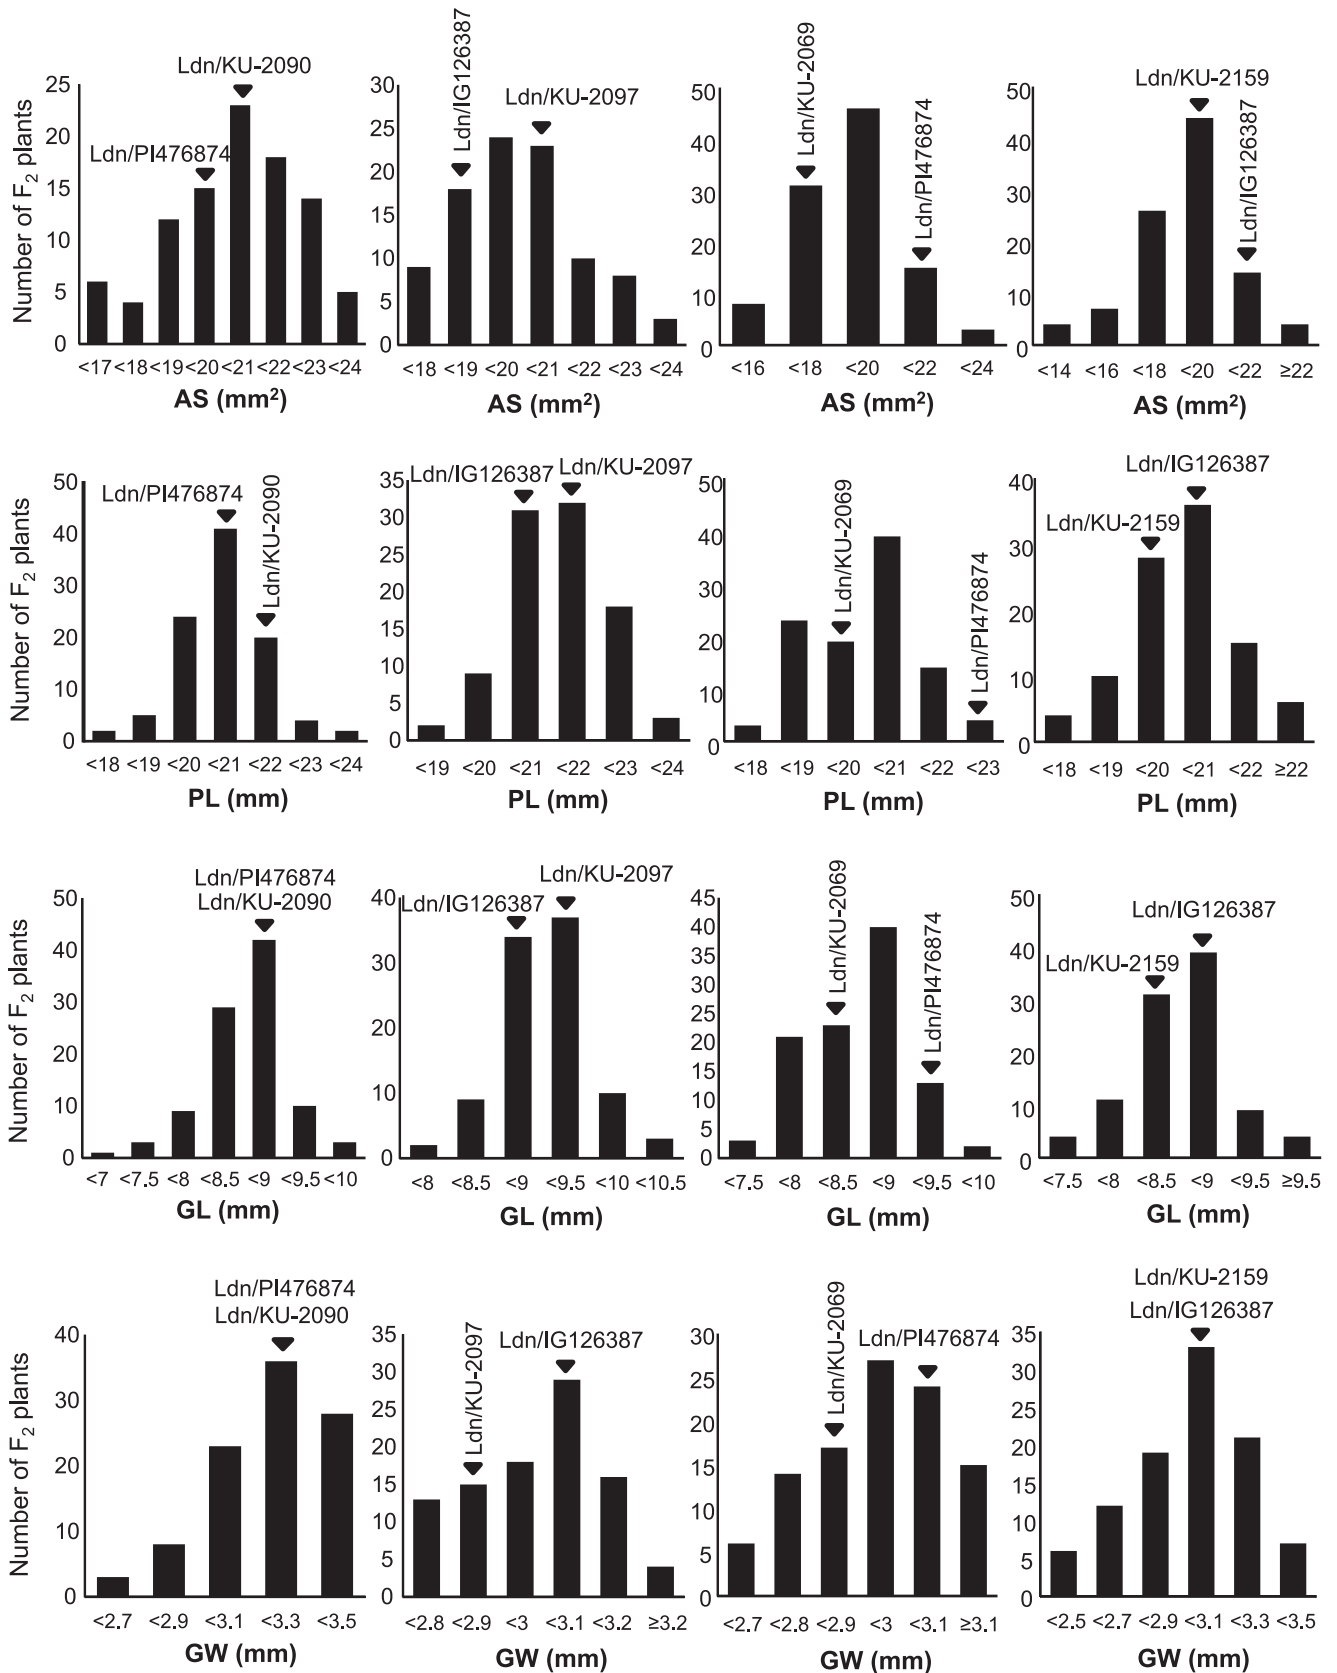

**Supplemental Fig. 1.** Frequency distribution of the grain shape-related traits in the four mapping populations. Phenotypic values of the parental lines are indicated by arrow heads.

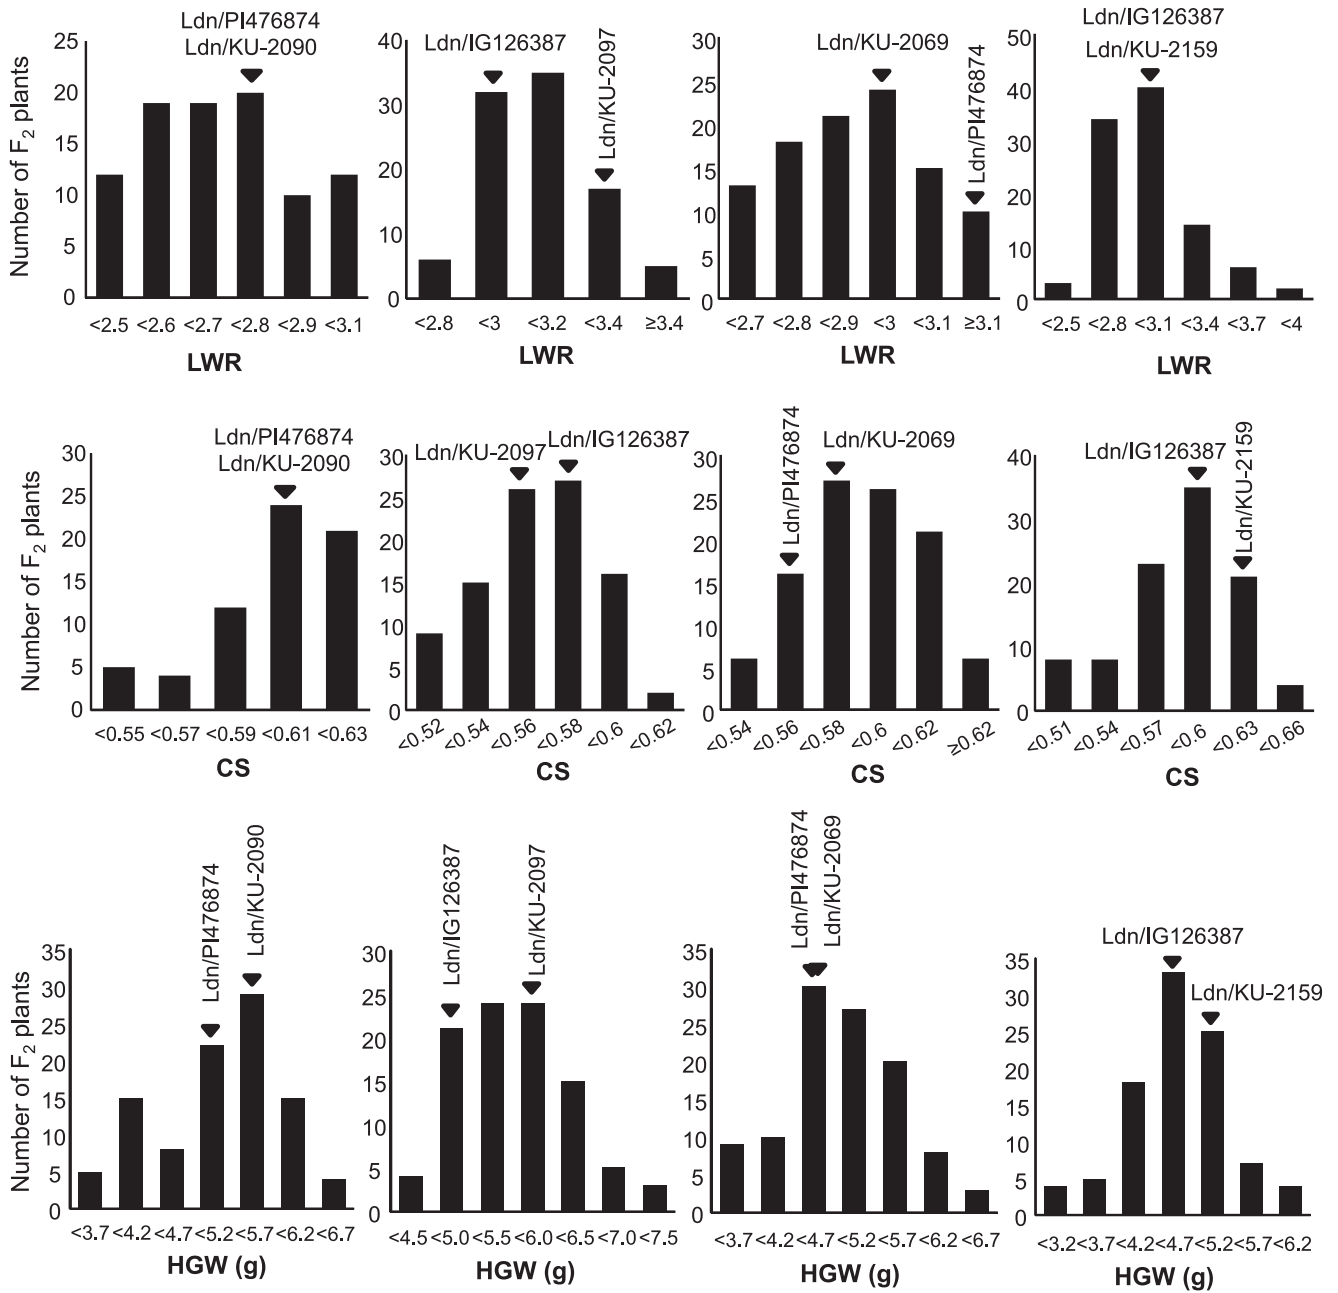

Supplemental Fig. 1. (continued)

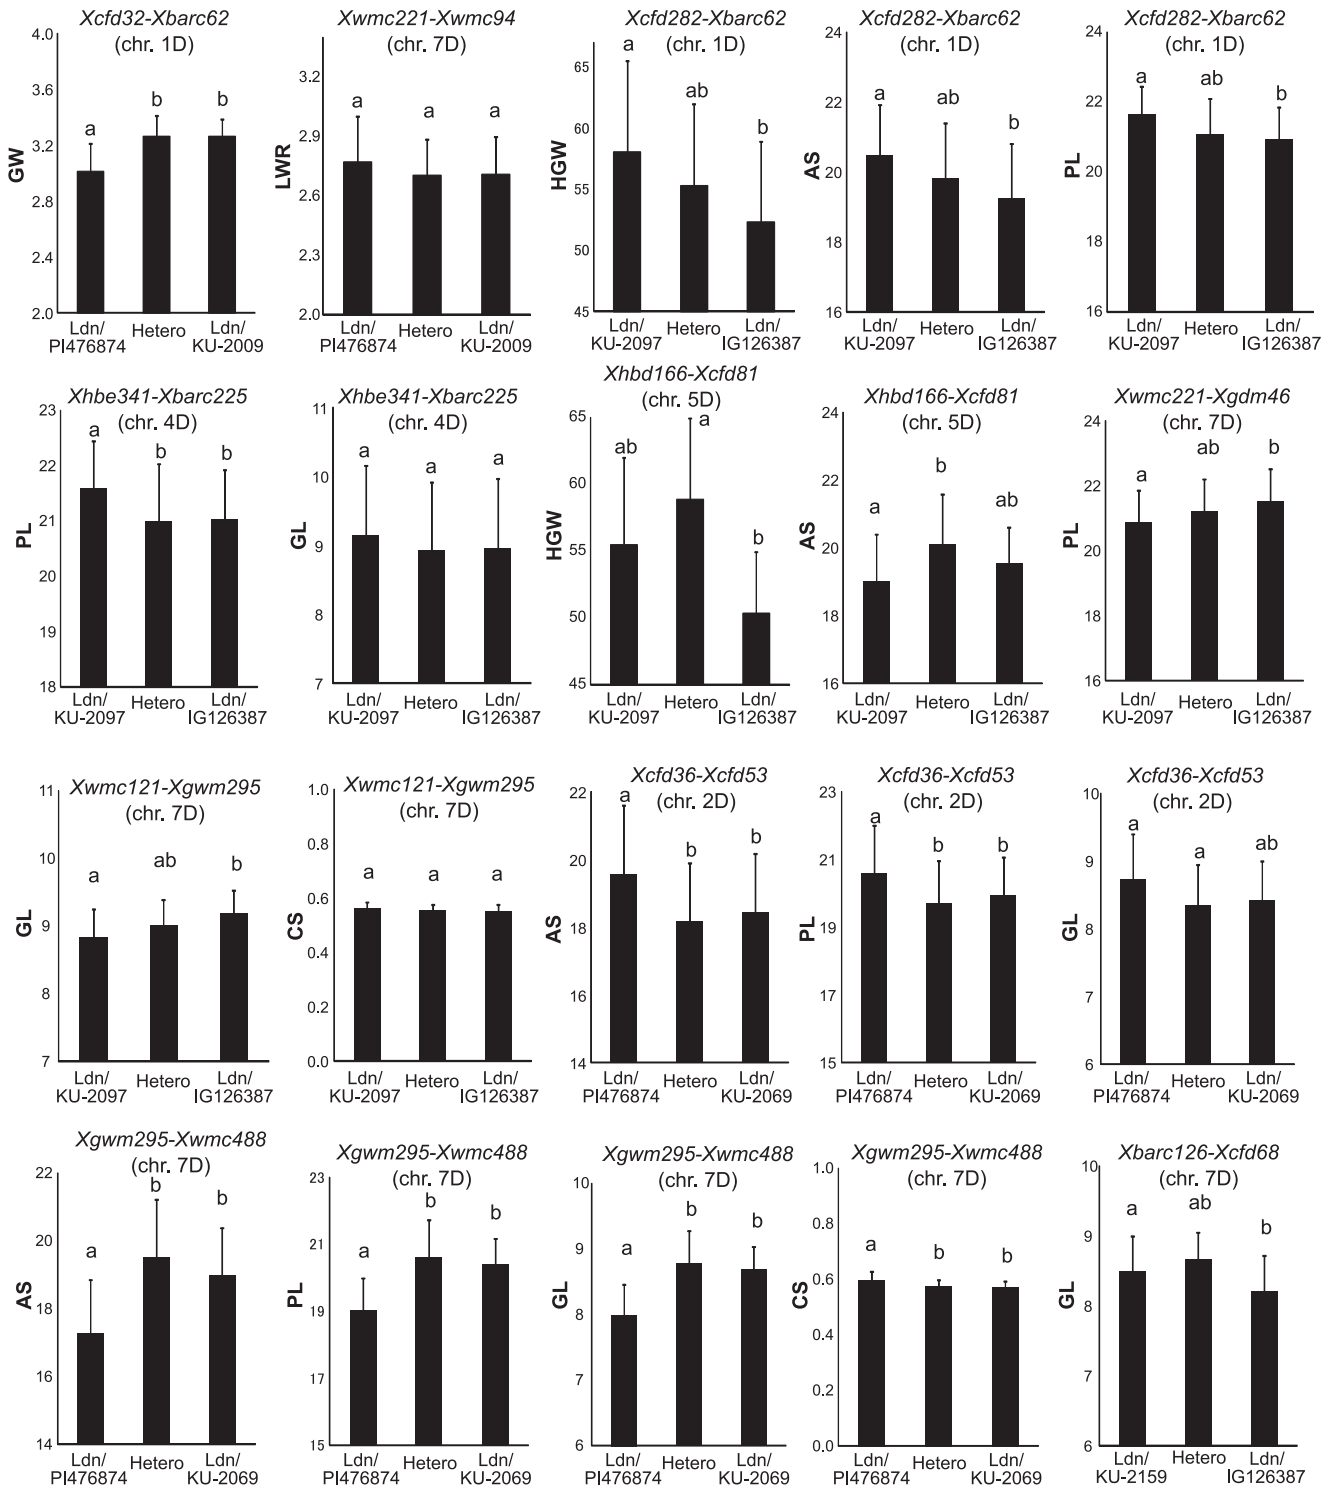

**Supplemental Fig. 2.** The genotype effects at each QTL on the observed variation in the grain shape-related traits in the four populations. Markers that were used to deduce the genotype at a QTL are listed above each graph. Means  $\pm$  standard deviation with the same letter were not significantly different ( $P > 0.05$ ) (Tukey-Kramer HSD test).
